# Supplementary material for: Fish and Meat Intake, Serum Eicosapentaenoic Acid and Docosahexaenoic Acid Levels, and Mortality in Community-Dwelling Japanese Older Persons
Source: PubMed Central journal article supplement (PMC6572518; doi:10.3390/ijerph16101806), 2019-05-21
Supplement: ijerph-16-01806-s001.pdf [file ijerph-16-01806-s001.pdf]

Tertiles of fish intake

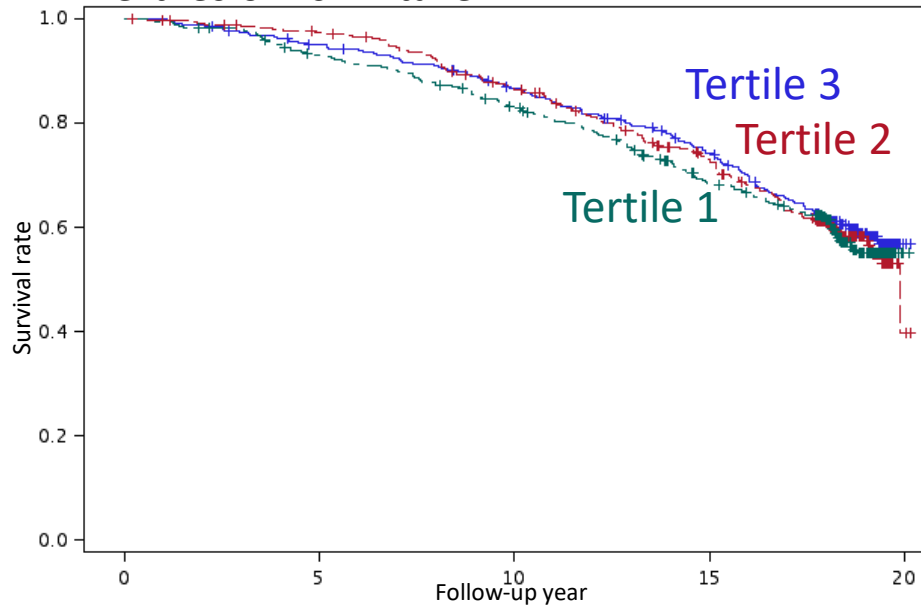

Tertiles of meat intake

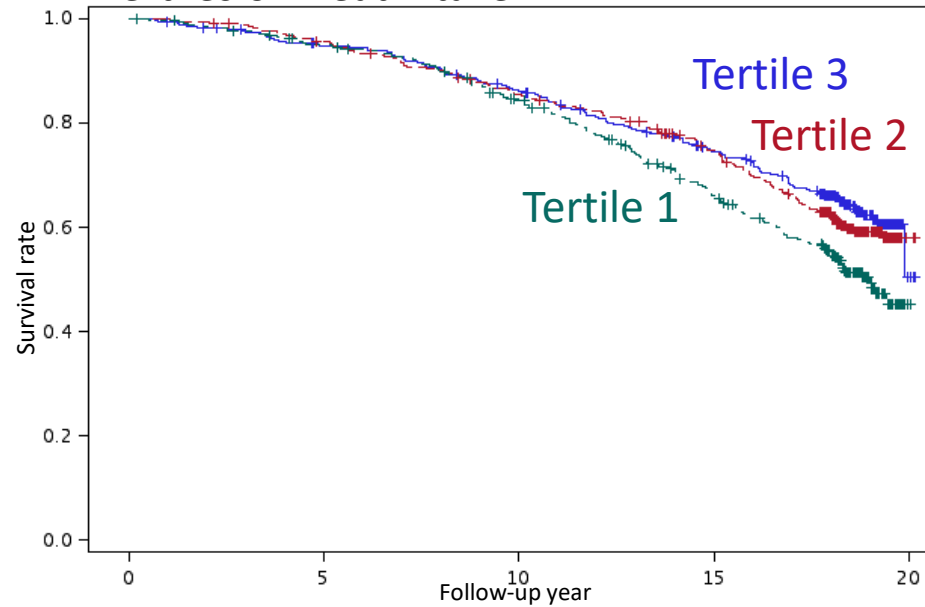

Tertiles of DHA intake

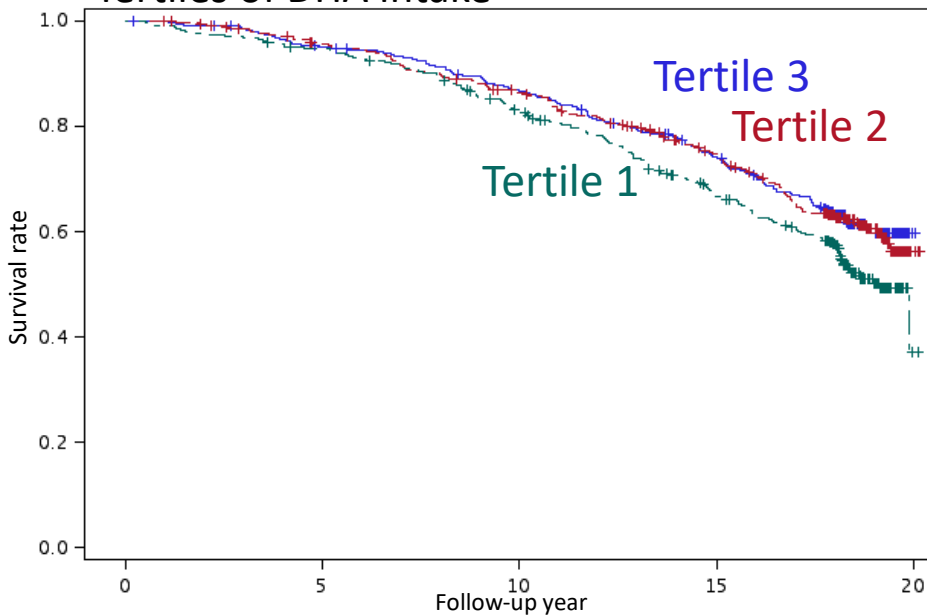

Tertiles of EPA intake

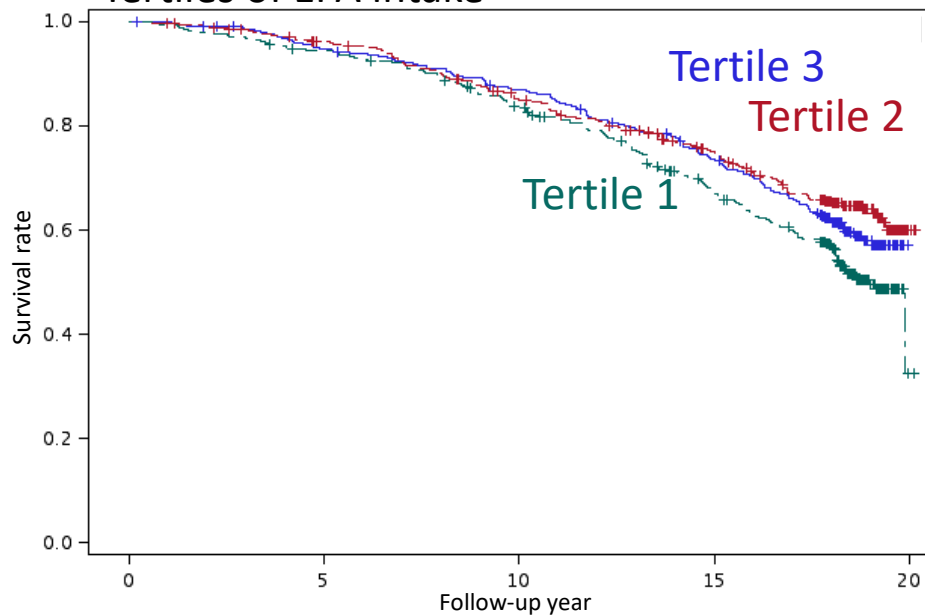

— · — Tertile 1    - - - Tertile 2    — Tertile 3

Supplementary Figure S1. Survival curves according to tertiles of fish, meat, DHA, and EPA intake

Tertiles of serum DHA

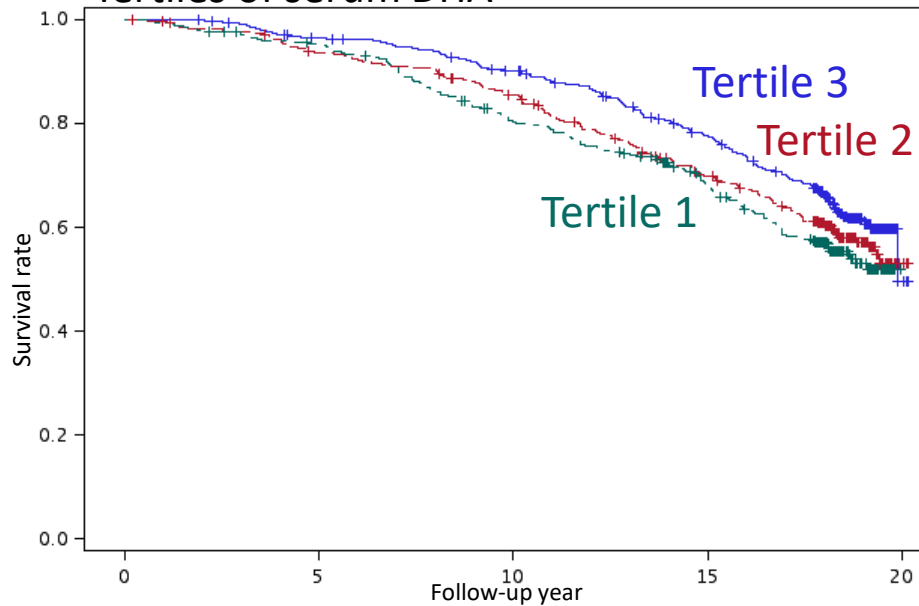

Tertiles of serum EPA

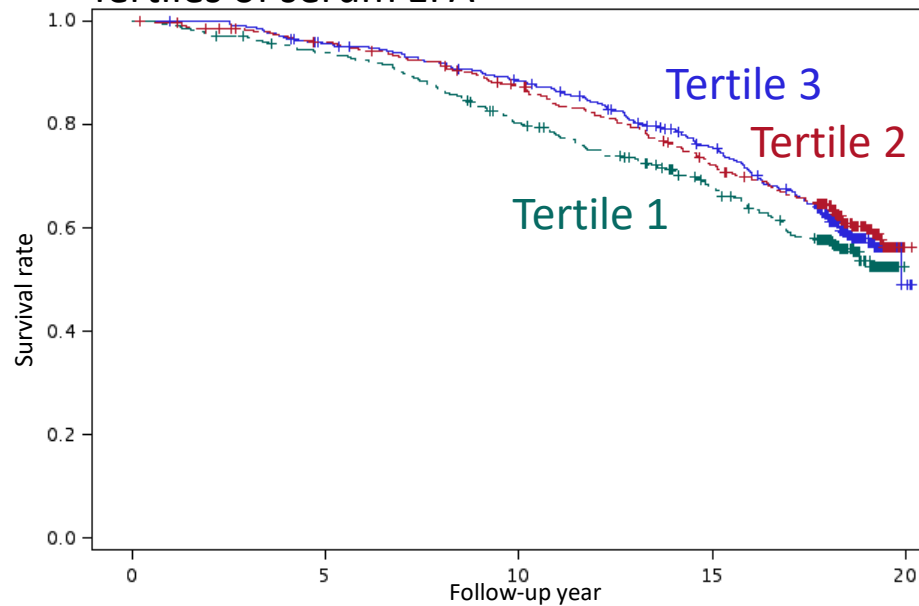

Tertiles of serum ARA

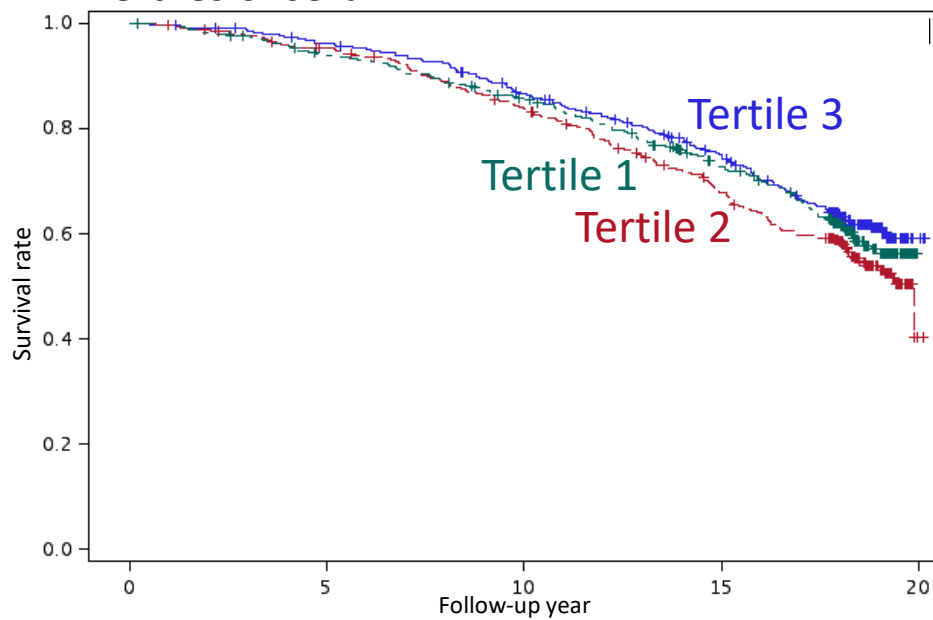

Tertiles of serum EPA/ARA ratio

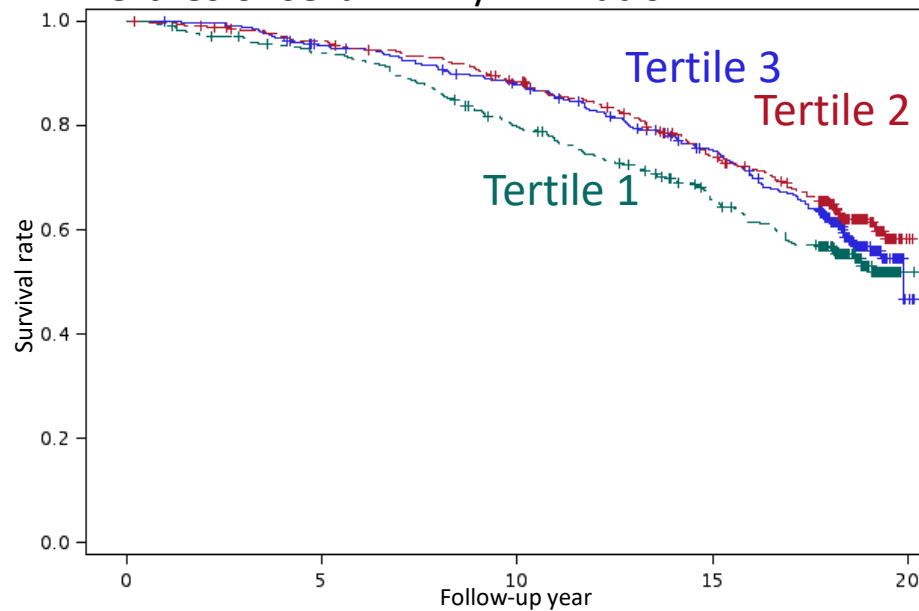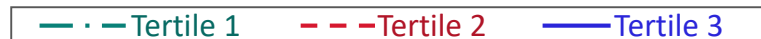

Supplementary Figure S2. Survival curves according to tertiles of serum DHA, EPA, ARA, and the EPA/ARA ratio
